# Supplementary material
Source: PubMed Central journal article supplement (PMC5603228)
Supplement: NIHMS899768-supplement-SI.pdf [file NIHMS899768-supplement-SI.pdf]

## SUPPORTING INFORMATION

### ***In Vivo* Structure-Activity Relationships and Optimization of an Unnatural Base Pair For Replication in a Semi-Synthetic Organism**

Aaron W. Feldman and Floyd E. Romesberg\*

*Department of Chemistry, The Scripps Research Institute, 10550 North Torrey Pines Road, La Jolla, California 92037, USA*

| <b>Table of Contents</b> ..... | <b>Page</b> |
|--------------------------------|-------------|
| Methods.....                   | S1          |
| Table S1 .....                 | S3          |
| Table S2 .....                 | S4          |
| Table S3 .....                 | S5          |
| Table S4 .....                 | S7          |
| Table S5 .....                 | S8          |
| Figure S1 .....                | S10         |
| Figure S2 .....                | S10         |
| References .....               | S11         |

## **Methods**

### ***In vivo* UBP replication**

#### ***Assembly of UBP-containing plasmids***

Inserts for Golden Gate assembly bearing the UBP were generated by PCR of chemically synthesized oligonucleotides bearing dNaM (**O1** for context 1, **O2** for context 2, **O3** for context 3, **O4** for context 4; 0.025 ng per 50  $\mu$ L reaction) using the primers **P1/P2** for context 1 or **P3/P4** for contexts 2–4 and conditions described previously,<sup>1</sup> under the following thermocycling protocol (times denoted as mm:ss): [96 °C 0:30 | 25  $\times$  [96 °C 0:30 | 47 °C 0:30 | 68 °C 4:00]].

Golden Gate assembly reactions were prepared by combining destination plasmid pUCX2 (1  $\mu$ g),<sup>2</sup> PCR insert (3:1 insert:plasmid molar ratio), T4 DNA ligase (533 U), BsaI-HF (53.3 U), and ATP (1 mM) in 1 $\times$  NEB CutSmart buffer (final volume 80  $\mu$ L). The reactions were thermocycled under the following conditions: [37 °C 20:00 | 40 $\times$  [37 °C 5:00 | 16 °C 10:00 | 22 °C 5:00] | 37 °C 20:00 | 50 °C 15:00 | 70 °C 30:00]. Following thermocycling, T5 exonuclease (13.3 U) and additional BsaI-HF (26.6 U) were added, and the reactions were incubated at 37 °C for an additional hour. Assembled plasmids were purified on a Zymo-Spin I column, and quantified fluorometrically using a Qubit fluorometer (ThermoFisher). Refer to Table S1 for list of sequences.

### ***Transformation and replication of UBP-containing plasmids***

The *E. coli* SSO was made electrocompetent as described previously,<sup>2</sup> and an aliquot (50  $\mu$ L) was transformed with 2 ng pINF plasmid. Upon electroporation, cells were immediately diluted with media supplemented with chloramphenicol (950  $\mu$ L). An aliquot of diluted cells (10  $\mu$ L) was immediately diluted 10-fold with the same media, and further supplemented with dNaMTP (125  $\mu$ M) and dTPT3TP (25  $\mu$ M) for plasmid recovery. Transformed cells were incubated at 37 °C for 1 h before pelleting each sample by centrifugation. Recovery media was removed, and cells were resuspended in an equivalent volume of fresh media lacking unnatural triphosphate and supplemented with ampicillin for pINF selection. An aliquot of these cells (10  $\mu$ L) was used to inoculate cultures of fresh media supplemented with ampicillin for pINF selection, as well as fresh unnatural triphosphates at specified concentrations (final volume of 100  $\mu$ L). Samples were then further incubated at 37 °C, monitoring for growth, and harvesting by pelleting (9,000 r.c.f., 10 min) at an OD<sub>600</sub> of ~0.7.

### ***Analysis of pINF plasmids by biotin shift PCR***

Plasmids were isolated for analysis using commercial miniprep kits (ZR Plasmid Miniprep Classic, Zymo Research), and analyzed for UBP retention by biotin shift PCR, as described previously.<sup>1,2</sup> PCR conditions were as follows: plasmid miniprep (0.5  $\mu$ L, diluted 5-fold for samples grown to saturation), dNTPs (400  $\mu$ M), 1 $\times$  SYBR Green, MgSO<sub>4</sub> (2.2 mM), primers (**P5/P6** for context 1, **P7/P8** for contexts 2–4; 1  $\mu$ M each), d5SICSTP and dMMO2<sup>BIO</sup>TP (65  $\mu$ M each), OneTaq DNA polymerase (0.018 U/ $\mu$ L), and DeepVent DNA polymerase (0.007 U/ $\mu$ L) in 1 $\times$  OneTaq standard reaction buffer (final volume 15  $\mu$ L). Thermocycling conditions were as follows: [20  $\times$  [95 °C 0:15 | 52 °C 0:15 | 68 °C 4:00]]. An aliquot (1  $\mu$ L) of each reaction was mixed with a solution of streptavidin (2.5  $\mu$ L, 2  $\mu$ g/ $\mu$ L, Promega), and incubated at room temperature for 10 min. Streptavidin-bound amplicon was then resolved from unbound amplicon on a 6% polyacrylamide (29:1 acrylamide:bis-acrylamide) TBE gel, at 120 V for 25 min. Gels were then stained with 1 $\times$  SYBR Gold (Thermo Fisher) and imaged using a Molecular Imager Gel Doc XR+ equipped with a 520DF30 filter (Bio-Rad).

UBP retention was measured by densitometric analysis of the gels (Quantity One 1-D Analysis Software, Bio-Rad) from the biotin shift assay and calculation of a percent raw shift, which equals the intensity of the streptavidin-shifted band divided by the sum of the intensities of the shifted and unshifted bands. Reported UBP retentions are percent raw shift for a given sample normalized to the percent raw shift of the input pINF plasmid used.

**Table S1. Oligonucleotides and plasmids used in this study.**

|           | <i>Sequence (5'→3')</i>                                                          |
|-----------|----------------------------------------------------------------------------------|
| <b>O1</b> | CTGTTTCCTGTGTGAAATTGTTATCCGCTCACA-dNaM-TTCCACACAACATACGAGCCGGAAGCATAAAGTGTAAAGCC |
| <b>O2</b> | CTCGAGTACAACCTTTAACTCACACAATGTA-dNaM-AGATCACGGCAGACAAAACAAAAGAATGGAATC           |
| <b>O3</b> | CTCGAGTACAACCTTTAACTCACACAATGTAC-dNaM-CATCACGGCAGACAAAACAAAAGAATGGAATC           |
| <b>O4</b> | CTCGAGTACAACCTTTAACTCACACAATGTAC-dNaM-GATCACGGCAGACAAAACAAAAGAATGGAATC           |
| <b>P1</b> | ATGGGTCTCCAGTGGCTGTTTCTGTGTGAAATTGTTATCCGC                                       |
| <b>P2</b> | ATGGGTCTCTTCGTTGGCTTTACACTTTATGCTTCCGGC                                          |
| <b>P3</b> | ATGGGTCTCCAGTGGCTCGAGTACAACCTTTAACTCACAC                                         |
| <b>P4</b> | ATGGGTCTCTTCGTTGATTCCATTCTTTTGTGTTGTCTGC                                         |
| <b>P5</b> | CTGTTTCCTGTGTGAAATTGTTATCC                                                       |
| <b>P6</b> | GGCTTTACACTTTATGCTTCCG                                                           |
| <b>P7</b> | CTCGAGTACAACCTTTAACTCACAC                                                        |
| <b>P8</b> | GATTCCATTCTTTTGTGTTGTCTGC                                                        |

***pUCX2 (3174 bp)***

AACGCCAGCAACGCGGCCTTTTTACGGTTCCCTGGCCTTTTGCTGGCCTTTTGCTCACATGTTCTTTCTGCGTTATCCC  
 CTGATTCTGTGGATAACCGTATTACCGCCTTTGAGTGAGCTGATACCGCTCGCCGACGCCGAACGACCGAGCGCAGCA  
 GTCAGTGAGCGAGGAAGCGGAAGAGCGCCCAATACGCAAACCGCCTCTCCCGCGCGTTGGCCGATTCAATTAATGCAAGC  
 TGGCAGCAGAGGTTTCCCGACTGGAAAGCGGGCAGTGAGCGCAACGCAATTAATGTAAGTTAGCTCACTCATTAGGCAC  
 CCCACTATGACCATGATTACGCCAAGCTTGCATGCCTGCAGGTCGACTCTAGAGGATCCCCGGGTACCGAGCTCGAATT  
 CACTGGCCGTCGTTTTACAACGTCGTGACTGGGAAAACCCCTGGCGTTACCCAACTTAATCGCCTTGCAGCACATCCCC  
 TTTCGCCAGCTGGCGTAATAGCGAAGAGGCCCGCACCGATCGCCCTTCCCAACAGTTGCGCAGCCTGAATGGCGAATGG  
 CGCCTGATGCGGTATTTTCTCCTTACGCATCTGTGCGGTATTTACACCCGCATATGGTGCACCTCTCAGTACAATCTGCT  
 CTGATGCCGATAGTTAAGCCAGCCCCGACACCCGCCAACCCCGCTGACGCGCCCTGACGGGCTTGTCTGCTCCCGGC  
 ATCCCGTTACAGACAAGCTGTGACCGTCTCCGGGAGCTGCATGTGTGAGAGGTTTTACCGTCAACCCGAAACGCGCG  
 AGACGAAAGGGCCTCGTGATACGCCTATTTTTATAGGTTAATGTGATGATAAATAATGGTTTTCTTAGACGTCAGGTGGCA  
 CTTTTCGGGGAAATGTGCGCGGAACCCCTATTTGTTTATTTTTCTAAATACATCAAATATGTATCCGCTCATGAGACA  
 ATAACCCTGATAAATGCTTCAATAATATTGAAAAGGAAGAGTATGAGTATCAACATTTCCGTGTCGCCCTTATTTCC  
 TTTTTGCGGCATTTTGCCTTCCCTGTTTTTGTCTACCCAGAAACGCTGGTGAAAGTAAAAGATGCTGAAGATCAGTTGG  
 GTGCACGAGTGGGTTACATCGAAGTGGATCTCAACAGCGGTAAGATCCTTGAGAGTTTTCGCCCCGAAGAACGTTTTCC  
 AATGATGAGCACTTTTAAAGTTCTGCTATGTGGCGGTTATTTCCGCTATTGACGCGGGCAAGAGCAACTCGGTCCG  
 CGCATACACTATCTCAGAATGACTTGGTTGAGTACTACCAGTCAAGAAAAGCATCTTACCGATGGCATGACAGTAA  
 GAGAATTATGCAAGTGTGCCATAACCATGAGTGATAACACTGCGGCCAACTTACTTCTGACAACGATCGGAGGACCGAA  
 GGAGCTAACCGCTTTTTTGCACAACATGGGGGATCATGTAACCTCGCCTTGATCGTTGGGAACCGGAGCTGAATGAAGCC  
 ATACCAACGACGAGCGTGACACCACGATGCCTGTAGCAATGGCAACAACGTTGCGCAAACATTAACCTGGCGAAGTAC  
 TTACTCTAGCTTCCCGGCAACAATTAATAGACTGGATGGAGGCGGATAAAGTTGCAGGACCCTTCTGCGCTCGGCCCT  
 TCCGGCTGGCTGGTTTTATTGCTGATAAATCTGGAGCCGGTGAGCGTGGCTCCTCGCGGTATCATGTCAGCACTGGGGCA  
 GATGGTAAGCCCTCCCGTATCGTAGTTATCTACACGACGGGAGTCAGGCAACTATGGATGAACGAAATAGACAGATCG  
 CTGAGATAGGTGCCTCACTGATTAAGCATTGGTAAGTGTGACACCAAGTTTACTCATATATACTTTAGATTGATTTAAA  
 ACTTCATTTTTTAATTTAAAAGGATCTAGGTGAAGATCCTTTTTGATAATCTCATGACCAAAATCCCTTAACGTGAGTTT  
 TCGTTGAGACCATTCTCACCAATAAAAAACGCCGGCGGCAACCGAGCGTTCTGAACAAATCCAGATGGAGTTCTGAGG  
 TCATTAAGTGGATCTATCAACAGGAGTCCAAGCGAGCTCTCAGTCTGCTCCTCGGCCACGAAGTGCACGCAGTTGCCGG  
 CCGGGTTCGCGCAGGGCGAAGTCCCGCCCCACGGCTGCTCGCCGATCTCGGTGATGGCCGGCCCGGAGGCGTCCCGGAA  
 GTTCGTGGACACGACCTCCGACCCTCGGCGTACAGCTCGTCCAGCCGCGCACCCACCCAGGCCAGGGTGTGTGTC  
 GGCACCACCTGGTCCCTGGACCGCGCTGATGAACAGGGTCAACGTCGTCCCGGACCACCCGGCGAAGTCTGCTCCACGA  
 AGTCCCGGGGAGAACCCGAGCCGGTCCGGTCCAGAACTCGACCGCTCCGGCGACGTCGCGCGCGGTGAGCACCGGAACGGC  
 ACTGGTCAACTTGGCCATGGTTTAGTTTCTCCTCACCTTGTGCTATFATACTATGCCGATATACTATGCCGATGATTAATTG  
 TCACGACGGGTCTCCCACTGAGCGTCAGACCCCGTAGAAAAGATCAAAGGATCTTCTTGGATCCTTTTTTTCTGCGC  
 GTAATCTGCTGCTTGCAAACAAAAAACCCGCTACCAGCGGTGGTTTTGTTTGGCGGATCAAGAGCTACCAACTCTTT  
 TTCCGAAGTAACTGGCTTCAGCAGAGCGCAGATACCAATACTGTTCTTCTAGTGTAGCCGTAGTTAGGCCACCACTT  
 CAAGAAGTGTAGCACCGCTACATACCTCGCTCTGCTAATCCTGTTACCAGTGGCTGCTGCCAGTGGCGATAAGTCTG  
 TGCTTACCAGGTTGGACTCAAGCAGATAGTTACCGGATAAGGCGCAGCGGTGGGCTGAACGGGGGTTCTGTGCACAC  
 AGCCAGCTTGGAGCGAACGACCTACACCGAAGTACAGGATACCTACAGCGTGTGAGCTATGAGAAAGCGCCACGCTTCCCGA  
 AGGGAGAAAGCGGACAGGTATCCGGTAAGCGGCAGGGTCCGAAACAGGAGAGCGCACGAGGGAGCTTCCAGGGGAAAC  
 GCCTGGTATCTTTATAGTCTGTCGGGTTTTCGCCACCTCTGACTTGAGCGTGCATTTTTTGTGTGCTCGTCAGGGGGCG  
 GAGCCTATGGAAA

**Table S2. Nucleotides used in this study.**

| dXTPs |         |      |    | dYTPs                  |    |    |                     |    |
|-------|---------|------|----|------------------------|----|----|---------------------|----|
|       |         | Ref. |    | Ref.                   |    |    | Ref.                |    |
| 1     | dDMN    | 3    | 39 | dTOK587                | 4  | 1  | dICS                | 3  |
| 2     | d4OMe   | 5    | 40 | dTOK576                | 4  | 2  | d4MICS              | 6  |
| 3     | dIQ     | 7    | 41 | dTOK581                | 4  | 3  | d5MICS              | 6  |
| 4     | d2MN    | 3    | 42 | dTOK580                | 4  | 4  | dNICS               | 8  |
| 5     | d3OMe   | 5    | 43 | dPhMO                  | 9  | 5  | dSICS               | 8  |
| 6     | dQL     | 7    | 44 | dPyMO1                 | 9  | 6  | d4SICS              | 10 |
| 7     | d2Np    | 3    | 45 | dPyMO2                 | 9  | 7  | d5SICS              | 10 |
| 8     | dDM4    | 11   | 46 | dPMO3                  | 9  | 8  | dSNICS              | 8  |
| 9     | dBEN    | 11   | 47 | dPMO2                  | 9  | 9  | dONICS              | 8  |
| 10    | dMM1    | 11   | 48 | dFuMO1                 | 9  | 10 | d7OFP               | 12 |
| 11    | dDM2    | 11   | 49 | dFuMO2                 | 9  | 11 | d7OTP               | 12 |
| 12    | dDM     | 3    | 50 | dTpMO1                 | 9  | 12 | d4OTP               | 12 |
| 13    | d3FB    | 14   | 51 | dTpMO2                 | 9  | 13 | dTPT3               | 13 |
| 14    | dMMO1   | 5    | 52 | dFIMO                  | 9  | 14 | dFTPT1              | 13 |
| 15    | dDM5    | 11   | 53 | dMIMO                  | 9  | 15 | dTPT1               | 13 |
| 16    | d2Py    | 7    | 54 | dFEMO                  | 9  | 16 | dTPT3 <sup>PA</sup> | 13 |
| 17    | d3MPy   | 7    | 55 | dIMO                   | 9  |    |                     |    |
| 18    | d4MPy   | 7    | 56 | dMEMO                  | 9  |    |                     |    |
| 19    | d5MPy   | 7    | 57 | dEMO                   | 9  |    |                     |    |
| 20    | d34DMPy | 7    | 58 | dMMO2                  | 5  |    |                     |    |
| 21    | d35DMPy | 7    | 59 | dDMO                   | 5  |    |                     |    |
| 22    | dEPy    | 7    | 60 | d5FM                   | 15 |    |                     |    |
| 23    | d45DMPy | 7    | 61 | d2OMe                  | 5  |    |                     |    |
| 24    | dBp     | 16   | 62 | dNaM                   | 15 |    |                     |    |
| 25    | dBTP    | 16   | 63 | dAPy                   | 7  |    |                     |    |
| 26    | dIN     | 16   | 64 | dMAPy                  | 7  |    |                     |    |
| 27    | dBzT    | 16   | 65 | dDMAPy                 | 7  |    |                     |    |
| 28    | dBf     | 16   | 66 | dFDMO                  | 9  |    |                     |    |
| 29    | dTp     | 17   | 67 | dZMO                   | 9  |    |                     |    |
| 30    | dMTp    | 17   | 68 | dTfMO                  | 9  |    |                     |    |
| 31    | dAM     | 18   | 69 | dVMO                   | 9  |    |                     |    |
| 32    | dADM    | 18   | 70 | dCIMO                  | 9  |    |                     |    |
| 33    | dMAN    | 18   | 71 | dCNMO                  | 9  |    |                     |    |
| 34    | dMMAN   | 18   | 72 | dMMO2 <sup>A</sup>     | 19 |    |                     |    |
| 35    | dDMMAN  | 18   | 73 | dMMO2 <sup>PA</sup>    | 19 |    |                     |    |
| 36    | dTOK588 | 4    | 74 | dMMO2 <sup>BIO</sup>   | 2  |    |                     |    |
| 37    | dTOK582 | 4    | 75 | dMMO2 <sup>SSBIO</sup> | 19 |    |                     |    |
| 38    | dTOK586 | 4    |    |                        |    |    |                     |    |

**Table S3. UBP retention data for Figure 4a. An asterisk indicates no cell growth was observed.**

| name                   | 125 $\mu$ M |         |         |              | 10 $\mu$ M |         |         |              |
|------------------------|-------------|---------|---------|--------------|------------|---------|---------|--------------|
|                        | Trial 1     | Trial 2 | Trial 3 | avg $\pm$ sd | Trial 1    | Trial 2 | Trial 3 | avg $\pm$ sd |
| dMMO2                  | 103         | 110     | 107     | 107 $\pm$ 4  | 86         | 80      | 82      | 83 $\pm$ 3   |
| dDMO                   | 100         | 104     | 102     | 102 $\pm$ 2  | 4          | 12      | 12      | 10 $\pm$ 5   |
| dCIMO                  | 103         | 95      | 99      | 99 $\pm$ 4   | 88         | 75      | 81      | 81 $\pm$ 7   |
| dCNMO                  | 99          | 96      | 98      | 98 $\pm$ 1   | 78         | 95      | 85      | 86 $\pm$ 9   |
| d5FM                   | 100         | 95      | 98      | 98 $\pm$ 3   | 89         | 107     | 73      | 90 $\pm$ 17  |
| dNaM                   | 105         | 90      | 97      | 97 $\pm$ 7   | 44         | 44      | 36      | 41 $\pm$ 5   |
| dFDMO                  | 96          | 94      | 95      | 95 $\pm$ 1   | 22         | 40      | 27      | 30 $\pm$ 9   |
| dFIMO                  | 100         | 88      | 94      | 94 $\pm$ 6   | 72         | 43      | 62      | 59 $\pm$ 15  |
| dN3MO                  | 93          | 95      | 94      | 94 $\pm$ 1   | 6          | 31      | 26      | 21 $\pm$ 13  |
| dIMO                   | 98          | 89      | 94      | 94 $\pm$ 5   | 58         | 67      | 44      | 56 $\pm$ 11  |
| dMIMO                  | 103         | 84      | 93      | 93 $\pm$ 9   | 6          | 5       | 1       | 4 $\pm$ 3    |
| dFEMO                  | 96          | 83      | 90      | 90 $\pm$ 6   | 66         | 49      | 26      | 47 $\pm$ 20  |
| dMMO2 <sup>A</sup>     | 93          | 86      | 89      | 89 $\pm$ 4   | 33         | 58      | 44      | 45 $\pm$ 13  |
| d2OMe                  | 99          | 68      | 84      | 84 $\pm$ 16  | 13         | 30      | 24      | 22 $\pm$ 8   |
| dCF3MO                 | 85          | 70      | 77      | 77 $\pm$ 7   | 1          | 12      | 3       | 5 $\pm$ 6    |
| dMEMO                  | *           | 86      | 75      | 54 $\pm$ 47  | 7          | 2       | 1       | 3 $\pm$ 3    |
| dVMO                   | *           | 79      | 69      | 50 $\pm$ 43  | 17         | 31      | 11      | 20 $\pm$ 10  |
| dDM5                   | 85          | 9       | 23      | 39 $\pm$ 40  | *          | 13      | 2       | 5 $\pm$ 7    |
| d2MN                   | 77          | 6       | 21      | 34 $\pm$ 38  | 4          | 10      | 2       | 5 $\pm$ 4    |
| d45DMPy                | 82          | 5       | 15      | 34 $\pm$ 42  | 2          | 0       | 8       | 3 $\pm$ 4    |
| dEMO                   | 55          | 9       | 32      | 32 $\pm$ 23  | 5          | 6       | 5       | 6 $\pm$ 1    |
| dDM                    | 62          | 4       | 17      | 28 $\pm$ 30  | 1          | 12      | 4       | 6 $\pm$ 5    |
| dTOK581                | 65          | *       | 16      | 27 $\pm$ 34  | 5          | 15      | 5       | 8 $\pm$ 6    |
| dTOK587                | 45          | 5       | 13      | 21 $\pm$ 21  | 5          | 2       | 3       | 3 $\pm$ 1    |
| dPyMO2                 | 45          | 5       | 13      | 21 $\pm$ 21  | 4          | 9       | 0       | 5 $\pm$ 5    |
| d35DMPy                | 48          | *       | 12      | 20 $\pm$ 25  | 1          | 8       | 3       | 4 $\pm$ 4    |
| d5MPy                  | 45          | *       | 11      | 19 $\pm$ 24  | 2          | 6       | 0       | 3 $\pm$ 3    |
| dPyMO1                 | 27          | 9       | 18      | 18 $\pm$ 9   | 3          | 0       | 14      | 6 $\pm$ 7    |
| dPMO2                  | 36          | 5       | 10      | 17 $\pm$ 16  | 4          | 5       | 1       | 4 $\pm$ 2    |
| dMMO1                  | 29          | 6       | 9       | 15 $\pm$ 13  | 0          | 3       | 5       | 3 $\pm$ 2    |
| dBTP                   | 21          | 8       | 15      | 15 $\pm$ 6   | 2          | 2       | 0       | 1 $\pm$ 1    |
| dDM2                   | 29          | 6       | 9       | 14 $\pm$ 12  | 4          | 7       | 4       | 5 $\pm$ 2    |
| dMMO2 <sup>SSBIO</sup> | 25          | 3       | 14      | 14 $\pm$ 11  | 1          | 10      | 4       | 5 $\pm$ 5    |
| dMMO2 <sup>PA</sup>    | 23          | 5       | 14      | 14 $\pm$ 9   | 8          | 5       | 6       | 6 $\pm$ 1    |
| dDMMAN                 | 26          | 4       | 7       | 12 $\pm$ 11  | 4          | 0       | 2       | 2 $\pm$ 2    |
| dQL                    | 19          | 6       | 12      | 12 $\pm$ 6   | 1          | 4       | 0       | 2 $\pm$ 2    |
| dMM1                   | 24          | 5       | 7       | 12 $\pm$ 10  | 1          | 3       | 0       | 1 $\pm$ 2    |
| d4MPy                  | 26          | 0       | 7       | 11 $\pm$ 14  | 3          | 0       | 0       | 1 $\pm$ 2    |
| dBzT                   | 19          | 6       | 6       | 11 $\pm$ 7   | 4          | 6       | 1       | 4 $\pm$ 2    |

|                      |    |    |    |         |   |    |    |         |
|----------------------|----|----|----|---------|---|----|----|---------|
| d3OMe                | 20 | 4  | 6  | 10 ± 9  | 0 | 5  | 5  | 3 ± 3   |
| dPhMO                | 6  | 14 | 10 | 10 ± 4  | 4 | 13 | 10 | 9 ± 5   |
| d2Py                 | 13 | 7  | 10 | 10 ± 3  | 1 | 3  | 5  | 3 ± 2   |
| d3MPy                | 23 | 0  | 6  | 10 ± 12 | 1 | 6  | 0  | 2 ± 3   |
| d4OMe                | 14 | 5  | 10 | 10 ± 5  | 0 | 7  | 5  | 4 ± 4   |
| dPMO3                | 16 | 3  | 10 | 10 ± 6  | 1 | 10 | 0  | 4 ± 5   |
| dBPy                 | 20 | 3  | 6  | 10 ± 9  | 3 | 5  | 7  | 5 ± 2   |
| dMAN                 | 11 | 7  | 9  | 9 ± 2   | 2 | 1  | 7  | 3 ± 4   |
| dDMN                 | 9  | 10 | 9  | 9 ± 1   | 0 | 7  | 10 | 6 ± 5   |
| dIQ                  | 15 | 3  | 9  | 9 ± 6   | 1 | 3  | 5  | 3 ± 2   |
| d2NP                 | 14 | 4  | 9  | 9 ± 5   | 3 | 14 | 2  | 6 ± 7   |
| dFuMO2               | 19 | 1  | 5  | 9 ± 9   | 5 | 1  | 2  | 3 ± 2   |
| dEPy                 | 11 | 5  | 8  | 8 ± 3   | 3 | 5  | 4  | 4 ± 1   |
| dDM4                 | 11 | 4  | 8  | 8 ± 4   | 1 | 9  | 3  | 4 ± 4   |
| dMMAN                | 11 | 4  | 8  | 8 ± 3   | 2 | 9  | 12 | 8 ± 5   |
| dMTp                 | 15 | 0  | 8  | 8 ± 8   | 1 | 7  | 0  | 2 ± 4   |
| d3FB                 | 10 | 4  | 7  | 7 ± 3   | 1 | 9  | 2  | 4 ± 4   |
| dIN                  | 14 | 0  | 7  | 7 ± 7   | 3 | 2  | 4  | 3 ± 1   |
| dBEN                 | 10 | 4  | 7  | 7 ± 3   | 4 | 6  | 0  | 3 ± 3   |
| dMAP                 | 6  | 8  | 7  | 7 ± 1   | 2 | 1  | 0  | 1 ± 1   |
| dTp                  | 13 | 0  | 6  | 6 ± 6   | 0 | 6  | 2  | 3 ± 3   |
| dDMAP                | 8  | 5  | 6  | 6 ± 1   | 0 | 6  | 7  | 4 ± 4   |
| d34DMPy              | 12 | 0  | 6  | 6 ± 6   | 1 | 9  | 2  | 4 ± 4   |
| dBf                  | 12 | 0  | 6  | 6 ± 6   | 3 | 2  | 0  | 2 ± 2   |
| dTOK588              | 6  | 5  | 6  | 6 ± 1   | 4 | 3  | 4  | 3 ± 1   |
| dAM                  | 8  | 4  | 6  | 6 ± 2   | 5 | 16 | 4  | 8 ± 7   |
| dTOK586              | 7  | 4  | 6  | 6 ± 1   | 3 | 9  | 1  | 4 ± 4   |
| dTOK576              | 6  | 5  | 6  | 6 ± 1   | 2 | 3  | 5  | 3 ± 1   |
| dAP                  | 6  | 4  | 5  | 5 ± 1   | 5 | 1  | 2  | 3 ± 2   |
| dTOK580              | 4  | 7  | 5  | 5 ± 2   | 1 | 28 | 0  | 10 ± 16 |
| dFuMO1               | 11 | 0  | 5  | 5 ± 5   | 4 | 1  | 2  | 3 ± 1   |
| dTpMO1               | 7  | 3  | 5  | 5 ± 2   | 3 | 0  | 3  | 2 ± 2   |
| dMMO2 <sup>BIO</sup> | 7  | 2  | 4  | 4 ± 2   | 4 | 10 | 2  | 5 ± 5   |
| dTpMO2               | 7  | 2  | 4  | 4 ± 3   | 1 | 1  | 0  | 1 ± 1   |
| dTOK582              | 4  | 4  | 4  | 4 ± 0   | 3 | 0  | 5  | 3 ± 2   |
| dADM                 | 0  | 6  | 3  | 3 ± 3   | 2 | 8  | 1  | 4 ± 4   |

**Table S4. UBP retention data for Figure 4b. An asterisk indicates no cell growth was observed.**

| name                | 125 $\mu$ M |         |         |              | 25 $\mu$ M |         |         |              |
|---------------------|-------------|---------|---------|--------------|------------|---------|---------|--------------|
|                     | Trial 1     | Trial 2 | Trial 3 | avg $\pm$ sd | Trial 1    | Trial 2 | Trial 3 | avg $\pm$ sd |
| dTPT3 <sup>PA</sup> | 98          | 69      | 94      | 87 $\pm$ 16  | 70         | 93      | 93      | 85 $\pm$ 13  |
| dTPT3               | 92          | 71      | 89      | 84 $\pm$ 12  | 87         | 97      | 87      | 90 $\pm$ 6   |
| dSICS               | 96          | 54      | 96      | 82 $\pm$ 24  | 91         | 97      | 98      | 95 $\pm$ 4   |
| dFPT1               | 80          | 88      | 78      | 82 $\pm$ 5   | 73         | 82      | 85      | 80 $\pm$ 6   |
| d4SICS              | 59          | 90      | 90      | 80 $\pm$ 18  | 84         | 90      | 92      | 89 $\pm$ 4   |
| dTPT1               | 79          | 69      | 79      | 76 $\pm$ 6   | 80         | 96      | 90      | 89 $\pm$ 8   |
| d5SICS              | 59          | 82      | 86      | 76 $\pm$ 14  | 68         | 89      | 93      | 83 $\pm$ 13  |
| dNICS               | 81          | 62      | 79      | 74 $\pm$ 10  | 76         | 88      | 85      | 83 $\pm$ 6   |
| dSNICS              | 65          | 71      | 41      | 59 $\pm$ 16  | 71         | 86      | 89      | 82 $\pm$ 10  |
| dICS                | *           | *       | *       | *            | 71         | 86      | 86      | 81 $\pm$ 8   |
| d4MICS              | *           | *       | *       | *            | 66         | 80      | 94      | 80 $\pm$ 14  |
| d5MICS              | *           | *       | *       | *            | 59         | 74      | 80      | 71 $\pm$ 11  |
| dONICS              | *           | *       | *       | *            | *          | *       | *       | *            |
| d7OFP               | *           | *       | *       | *            | *          | *       | *       | *            |
| d7OTP               | *           | *       | *       | *            | *          | *       | *       | *            |
| d4OTP               | *           | *       | *       | *            | *          | *       | *       | *            |

**Table S5. UBP retention data for Figure 4c.**

| dTPT3 analog        | dNaM analog | Trial 1 | Trial 2 | Trial 3 | avg $\pm$ sd |
|---------------------|-------------|---------|---------|---------|--------------|
| dSICS               | d5FM        | 88      | 52      | 63      | 68 $\pm$ 18  |
|                     | dMMO2       | 39      | 9       | 9       | 19 $\pm$ 18  |
|                     | dCNMO       | 65      | 82      | 89      | 79 $\pm$ 12  |
|                     | dCIMO       | 66      | 50      | 66      | 61 $\pm$ 10  |
| dTPT3               | d5FM        | 100     | 78      | 83      | 87 $\pm$ 12  |
|                     | dMMO2       | 90      | 93      | 80      | 88 $\pm$ 7   |
|                     | dCNMO       | 97      | 94      | 94      | 95 $\pm$ 2   |
|                     | dCIMO       | 98      | 95      | 96      | 96 $\pm$ 2   |
| dTPT1               | d5FM        | 0       | 0       | 0       | 0 $\pm$ 0    |
|                     | dMMO2       | 0       | 0       | 0       | 0 $\pm$ 0    |
|                     | dCNMO       | 0       | 0       | 0       | 0 $\pm$ 0    |
|                     | dCIMO       | 0       | 0       | 0       | 0 $\pm$ 0    |
| d4SICS              | d5FM        | 0       | 0       | 0       | 0 $\pm$ 0    |
|                     | dMMO2       | 2       | 3       | 0       | 2 $\pm$ 1    |
|                     | dCNMO       | 9       | 5       | 4       | 6 $\pm$ 3    |
|                     | dCIMO       | 0       | 5       | 6       | 4 $\pm$ 3    |
| dTPT3 <sup>PA</sup> | d5FM        | 0       | 0       | 0       | 0 $\pm$ 0    |
|                     | dMMO2       | 0       | 4       | 3       | 3 $\pm$ 2    |
|                     | dCNMO       | 5       | 2       | 0       | 2 $\pm$ 2    |
|                     | dCIMO       | 2       | 5       | 6       | 4 $\pm$ 2    |
| d5SICS              | d5FM        | 0       | 0       | 0       | 0 $\pm$ 0    |
|                     | dMMO2       | 0       | 0       | 0       | 0 $\pm$ 0    |
|                     | dCNMO       | 6       | 5       | 5       | 5 $\pm$ 1    |
|                     | dCIMO       | 12      | 0       | 9       | 7 $\pm$ 6    |
| dNICS               | d5FM        | 0       | 0       | 0       | 0 $\pm$ 0    |
|                     | dMMO2       | 2       | 1       | 4       | 3 $\pm$ 2    |
|                     | dCNMO       | 0       | 7       | 2       | 3 $\pm$ 4    |
|                     | dCIMO       | 3       | 0       | 4       | 2 $\pm$ 2    |
| dSNICS              | d5FM        | 0       | 0       | 5       | 2 $\pm$ 3    |
|                     | dMMO2       | 0       | 0       | 0       | 0 $\pm$ 0    |
|                     | dCNMO       | 1       | 5       | 0       | 2 $\pm$ 3    |
|                     | dCIMO       | 6       | 11      | 2       | 6 $\pm$ 4    |
| dICS                | d5FM        | 4       | 3       | 5       | 4 $\pm$ 1    |
|                     | dMMO2       | 5       | 2       | 0       | 2 $\pm$ 2    |
|                     | dCNMO       | 1       | 0       | 0       | 0 $\pm$ 1    |
|                     | dCIMO       | 6       | 3       | 4       | 4 $\pm$ 1    |
| dFPT1               | d5FM        | 0       | 4       | 0       | 0 $\pm$ 0    |
|                     | dMMO2       | 1       | 4       | 4       | 3 $\pm$ 2    |
|                     | dCNMO       | 4       | 0       | 4       | 3 $\pm$ 2    |
|                     | dCIMO       | 0       | 5       | 0       | 0 $\pm$ 0    |
| d4MICS              | d5FM        | 1       | 4       | 6       | 4 $\pm$ 3    |



|               |              |   |   |   |           |
|---------------|--------------|---|---|---|-----------|
|               | <b>dMMO2</b> | 4 | 4 | 1 | $3 \pm 2$ |
|               | <b>dCNMO</b> | 0 | 0 | 0 | $0 \pm 0$ |
|               | <b>dCIMO</b> | 3 | 5 | 3 | $4 \pm 1$ |
| <b>d5MICS</b> | <b>d5FM</b>  | 1 | 3 | 6 | $4 \pm 3$ |
|               | <b>dMMO2</b> | 2 | 2 | 3 | $2 \pm 0$ |
|               | <b>dCNMO</b> | 0 | 0 | 0 | $0 \pm 0$ |
|               | <b>dCIMO</b> | 1 | 2 | 2 | $2 \pm 1$ |

---

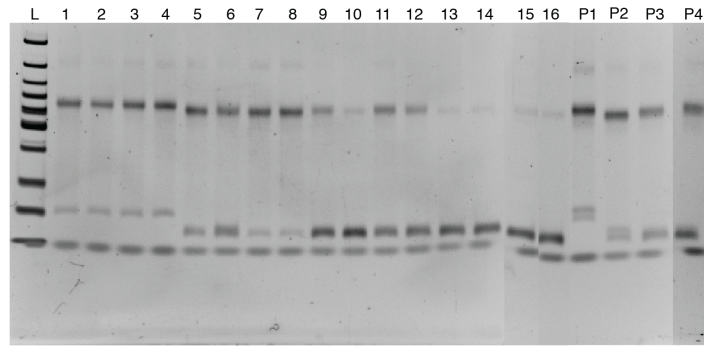

**Figure S1.** Representative 6% native PAGE gel of a single trial from Figure 6. Lane “L” is low molecular weight DNA ladder. Each grouping of four lanes from lane 1 to 16 represents, from left to right, dNaMTP at 125  $\mu$ M, dNaMTP at 25  $\mu$ M, dCNMOTP at 125  $\mu$ M, and dCNMOTP at 25  $\mu$ M. Lanes 1–4 show replication under these conditions in context 1. Lanes 5–8 show replication under these conditions in context 2. Lanes 9–12 show replication under these conditions in context 3. Lanes 13–16 show replication under these conditions in context 4. Lane P1 shows PCR products directly from *in vitro* constructed plasmids of context 1. Lane P2 shows PCR products directly from *in vitro* constructed plasmids of context 2. Lane P3 shows PCR products directly from *in vitro* constructed plasmids of context 3. Lane P4 shows PCR products directly from *in vitro* constructed plasmids of context 4.

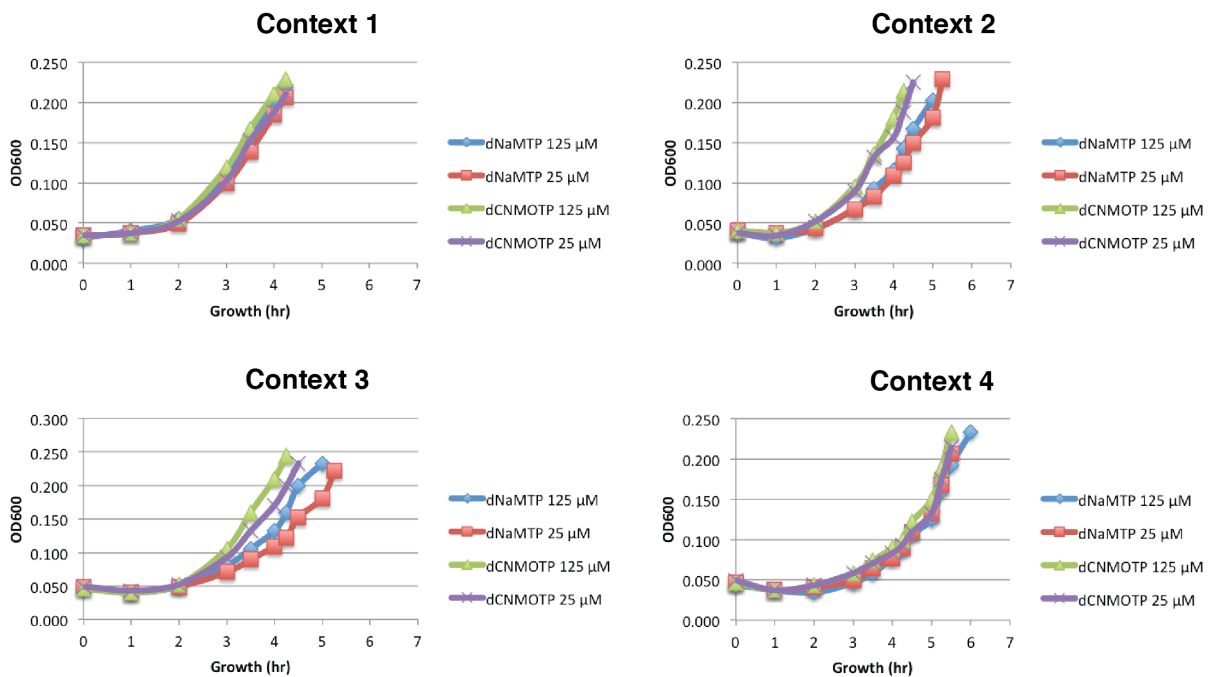

**Figure S2.** Growth curves of a single trial for the data presented in Figure 6.

## References

- (1) Malyshev, D. A.; Dhami, K.; Lavergne, T.; Chen, T.; Dai, N.; Foster, J. M.; Correa, I. R., Jr.; Romesberg, F. E. *Nature* **2014**, *509*, 385–388.
- (2) Zhang, Y.; Lamb, B.; Feldman, A. W.; Zhou, A. X.; Lavergne, T.; Li, L.; Romesberg, F. E. *Proc. Natl. Acad. Sci. USA* **2017**, *114*, 1317-1322..
- (3) Ogawa, A. K.; Wu, Y.; Berger, M.; Schultz, P. G.; Romesberg, F. E. *J. Am. Chem. Soc.* **2000**, *122*, 8803–8804.
- (4) Dhami, K.; Malyshev, D. A.; Ordoukhanian, P.; Kubelka, T.; Hocek, M.; Romesberg, F. E. *Nucleic Acids Res.* **2014**, *42*, 10235–10244.
- (5) Matsuda, S.; Leconte, A. M.; Romesberg, F. E. *J. Am. Chem. Soc.* **2007**, *129*, 5551–5557.
- (6) Wu, Y.; Ogawa, A. K.; Berger, M.; McMinn, D. L.; Schultz, P. G.; Romesberg, F. E. *J. Am. Chem. Soc.* **2000**, *122*, 7621-7632.
- (7) Hari, Y.; Hwang, G. T.; Leconte, A. M.; Joubert, N.; Hocek, M.; Romesberg, F. E. *Chembiochem* **2008**, *9*, 2796–2799.
- (8) Yu, C.; Henry, A. A.; Romesberg, F. E.; Schultz, P. G. *Angew. Chem. Int. Ed.* **2002**, *41*, 3841–3844.
- (9) Lavergne, T.; Degardin, M.; Malyshev, D. A.; Quach, H. T.; Dhami, K.; Ordoukhanian, P.; Romesberg, F. E. *J. Am. Chem. Soc.* **2013**, *135*, 5408–5419.
- (10) Leconte, A. M.; Hwang, G. T.; Matsuda, S.; Capek, P.; Hari, Y.; Romesberg, F. E. *J. Am. Chem. Soc.* **2008**, *130*, 2336–2343.
- (11) Matsuda, S.; Romesberg, F. E. *J. Am. Chem. Soc.* **2004**, *126*, 14419–14427.
- (12) Henry, A. A.; Yu, C.; Romesberg, F. E. *J. Am. Chem. Soc.* **2003**, *125*, 9638–9646.
- (13) Li, L.; Degardin, M.; Lavergne, T.; Malyshev, D. A.; Dhami, K.; Ordoukhanian, P.; Romesberg, F. E. *J. Am. Chem. Soc.* **2014**, *136*, 826–829.
- (14) Henry, A. A.; Olsen, A. G.; Matsuda, S.; Yu, C.; Geierstanger, B. H.; Romesberg, F. E. *J. Am. Chem. Soc.* **2004**, *126*, 6923–6931.
- (15) Seo, Y. J.; Hwang, G. T.; Ordoukhanian, P.; Romesberg, F. E. *J. Am. Chem. Soc.* **2009**, *131*, 3246–3252.
- (16) Matsuda, S.; Henry, A. A.; Schultz, P. G.; Romesberg, F. E. *J. Am. Chem. Soc.* **2003**, *125*, 6134–6139.
- (17) Berger, M.; Luzzi, S. D.; Henry, A. A.; Romesberg, F. E. *J. Am. Chem. Soc.* **2002**, *124*, 1222–1226.
- (18) Heo, J.-Y.; Hwang, G. T. *Bull. Korean Chem. Soc.* **2010**, *31*, 3794–3796.
- (19) Seo, Y. J.; Malyshev, D. A.; Lavergne, T.; Ordoukhanian, P.; Romesberg, F. E. *J. Am. Chem. Soc.* **2011**, *133*, 19878–19888.
